# Supplementary material for: Gliogenesis from the subventricular zone modulates the extracellular matrix at the glial scar after brain ischemia
Source: eLife. 2025 Aug 19;13:RP96076. doi: 10.7554/eLife.96076 (PMC12364484; doi:10.7554/eLife.96076)
Supplement: Source data 1. [file elife-96076-data1.xlsx]

## Sheet: Fig 1c
Figure 1c. Proportion of Thbs4-positive cells relative to the total NSCs population in the SVZ.
		Thbs4+ cells	undefined NSC
	Mouse 1	16.3462	83.6538
	Mouse 2	19.0789	80.9211
	Mouse 3	28.0952	71.9048
	Mouse 4	21.2013	78.7987
	Mouse 5	11.9708	88.0292
	Mouse 6	31.4583	68.5417

## Sheet: Fig 1d
Figure 1d. Classification of Thbs4-positive cells in the SVZ based to their NSC morphology.
		% type B	% type C	% type A	% undefined
	Mouse 1	37.5	12.5	0	25
	Mouse 2	56.6667	10	0	8.33333
	Mouse 3	85.4167	14.5833	0	0
	Mouse 4	91.6667	8.33333	0	0
	Mouse 5	50	0	0	25
	Mouse 6	100	0	0	0

## Sheet: Fig 1f
Figure 1f. Quantification of Thbs4-reporter expression showing the proportion of NSC expressing Thbs4 postnatally in the dorsal SVZ
		pThbs4-GFP
	Mouse 1	21.1044
	Mouse 2	16.6204
	Mouse 3	17.3065

## Sheet: Fig 1g
Figure 1g. Thbs4-GFP reporter expression was upregulated in the rostral SVZ
		ROSTRAL	INTERMEDIATE	CAUDAL
	Mouse 1	28.9391	20.0794	14.2948
	Mouse 2	20.5139	14.0006	15.3466
	Mouse 3	24.2262	19.8495	7.84392

## Sheet: Fig 2b
Figure 2b. The number of actively proliferating NSCs decreases at 7 and 15 dpi in the SVZ, as shown by reduced Nestin levels.
			MCAO
		Sham	7dd	15dd	30dd
	Mouse 1	31.78	0.23	7.42	5.01
	Mouse 2	24.4	0.59	2.11	11.1
	Mouse 3	9.8	1.43	1.04	15.97

## Sheet: Fig 2c
Figure 2c. The number of neuroblast decreases at 7 and 15 dpi in the SVZ, as shown by reduced DCX levels.
			MCAO
		Sham	7dd	15dd	30dd
	Mouse 1	10.59	1.91	2.36	4.96
	Mouse 2	4.72	1.04	4.02	6.69
	Mouse 3	5.97	3.71	0.47	8.49

## Sheet: Fig 2d
Figure 2d. Thbs4 expression increases in the SVZ over time following ischemic injury.
			MCAO
		Sham	7dd	15dd	30dd
	Mouse 1	2.34622	4.34134	7.43188	4.1176
	Mouse 2	1.00322	2.70837	1.62354	4.52152
	Mouse 3	1.10676	1.5964	3.8192	3.08606
	Mouse 4	0.71024	4.43026	4.42816	6.79086
	Mouse 5	0.341087	1.4107	10.6849	6.2114

## Sheet: Fig 2f
Figure 2f. Quantification of mean gray value (MGV) from E, normalized to GAPDH, shows an increased in Thbs4 in the 15 dpi SVZ.
		Sham	15dd MCAO
	Mouse 1	0.796853	1.33199
	Mouse 2	0.73136	0.959814
	Mouse 3	0.78493	1.41822

## Sheet: Fig 2g
Figure 2g. Quantification of mean gray value (MGV) from, normalized to GAPDH, shows a decrease in Nestin in the 15 dpi SVZ.
		Sham	15dd MCAO
	Mouse 1	0.838949	0
	Mouse 2	0.852387	0.0350983
	Mouse 3	1.30866	0.0150421

## Sheet: Fig 3b
Figure 3b. BrdU positive cells in the SVZ.
		Sham	30dd MCAO
	Mouse 1	15.2	36.7533
	Mouse 2	9	20.22
	Mouse 3	3.66667	13.3633

[truncated: 50 more sheets: Fig 3c, Fig 3e, Fig 3f, Fig 4b, Fig 4d, Fig 4g, Fig 4h, Fig 4i, Fig 5b, Fig 5e, Fig 5f, Fig 6b, Fig 6c, Fig 6e, Fig 6g, Fig 7c, Fig 7g, Fig 7h, Fig 8c, Fig 8d …]
